# Supplementary material for: Proactive Effect of Algae-Based Graphene Support on the Oxygen Evolution Reaction Electrocatalytic Activity of NiFe
Source: MDPI journal article supplement (doi:10.3390/ma16247641), 2023-12-14
Supplement: s1 [file s1]

# Supplementary Information

## Proactive Effect of Algae-Based Graphene Support on the Oxygen Evolution Reaction Electrocatalytic Activity of NiFe

María González-Ingelmo <sup>1</sup>, Marcos Granda <sup>1</sup>, Begoña Ruiz <sup>1</sup>, Enrique Fuente <sup>1</sup>, Uriel Sierra <sup>2</sup>, Victoria G. Rocha <sup>1</sup>, Zoraida González <sup>1</sup>, Patricia Álvarez <sup>1,\*</sup> and Rosa Menéndez <sup>1,\*</sup>

<sup>1</sup> Instituto de Ciencia y Tecnología del Carbono (INCAR), CSIC, Francisco Pintado, Fe 26, 33011 Oviedo, Spain; maria.ingelmo@incar.csic.es (M.G.-I.); mgranda@incar.csic.es (M.G.); begorb@incar.csic.es (B.R.); enriquef@incar.csic.es (E.F.); vgarcia-rocha@incar.csic.es (V.G.R.); zoraidag@incar.csic.es (Z.G.)

<sup>2</sup> Laboratorio Nacional de Materiales Gráficos, Centro de Investigación en Química Aplicada, Blvd. Enrique Reyna Hermosillo, 140, Saltillo 25294, Mexico; uriel.sierra@ciqa.edu.mx

\* Correspondence: par@incar.csic.es (P.Á.); rosmenen@incar.csic.es (R.M.); Tel.: +34-985119090 (P.Á. & R.M.)

1-Comparison of the reduction temperature in the OER activity.

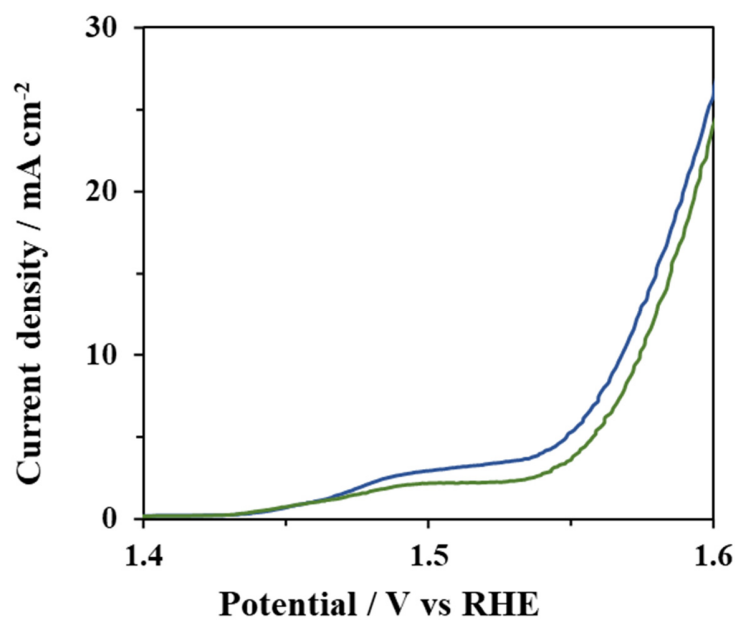

**Figure S1.** Linear sweep voltammetry of the samples TCP-G-GO-400-NiFe (blue) and TCP-G-GO-800-NiFe (green) recorded at 10 mVs<sup>-1</sup> in N<sub>2</sub> saturated KOH 1 M electrolyte.

2-SEM images:

a-SEM image of base TCP

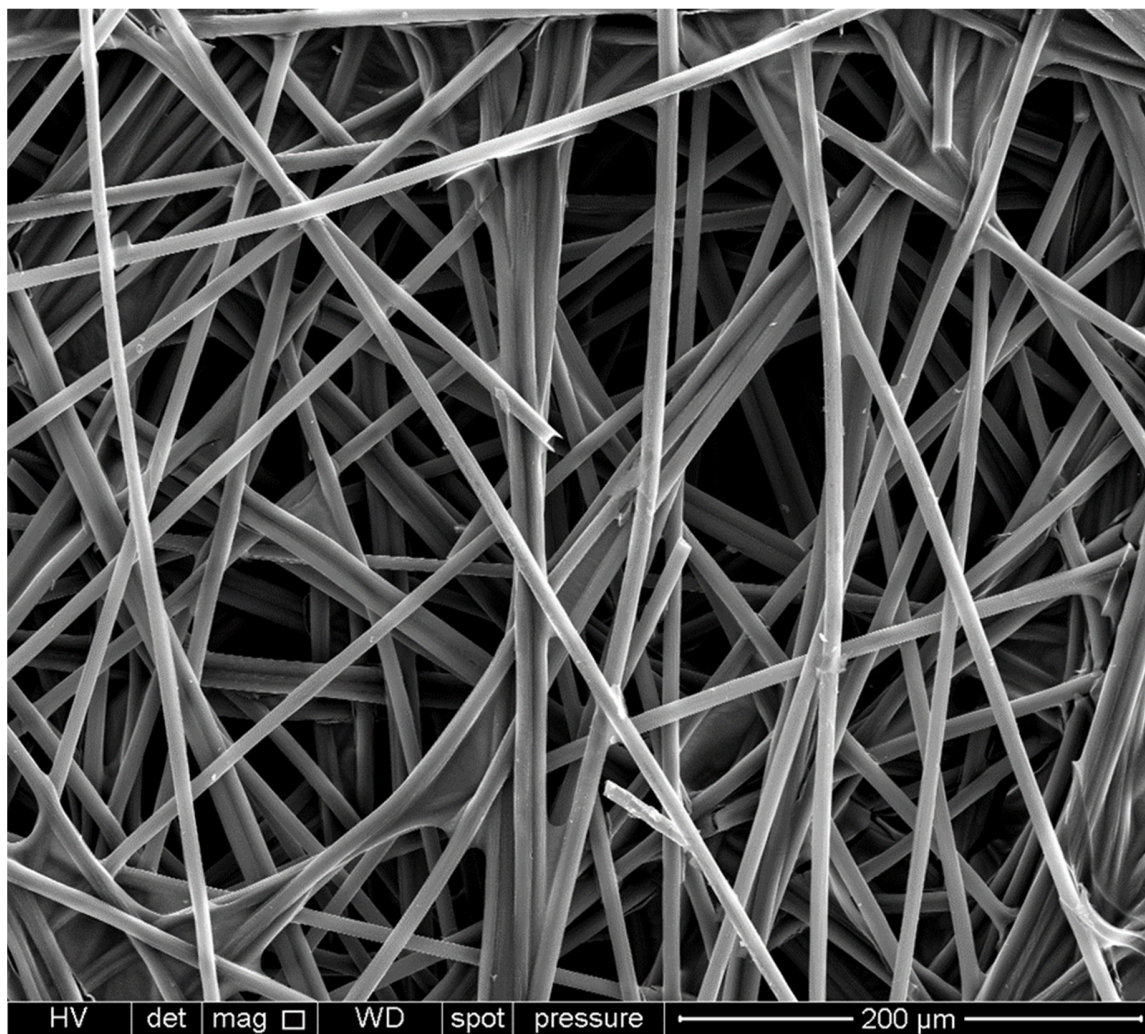

Figure S2. SEM image of thermally treated Toray Carbon Paper.

**b-SEM analysis of graphite-based graphene material**

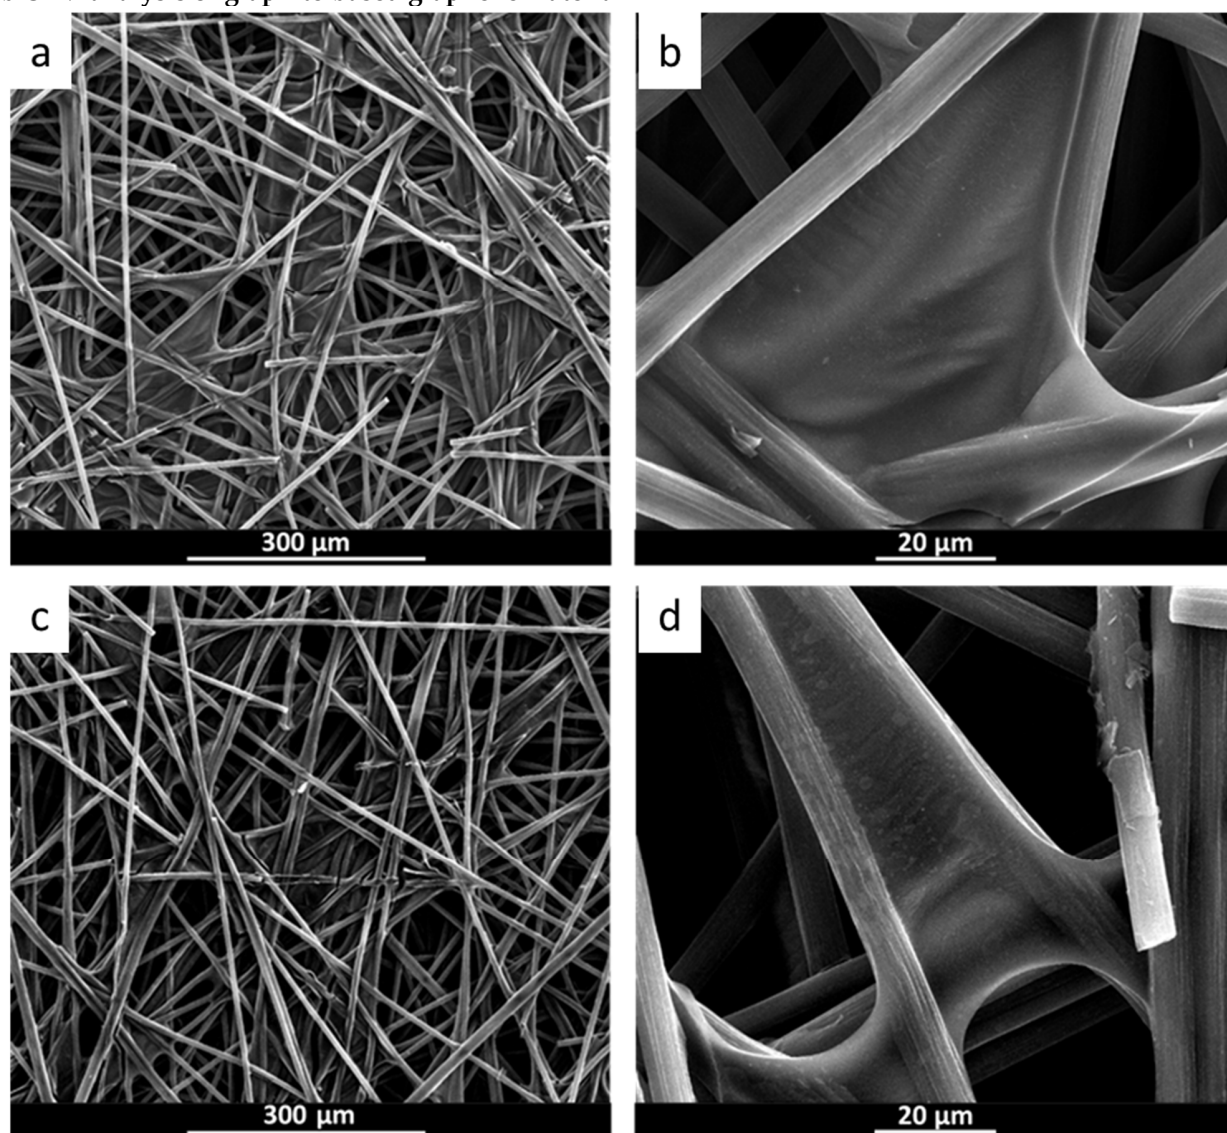

**Figure S3.** SEM analysis of graphite-based graphene material: a,b) deposited on TCP. c,d) after electrodeposition of NiFe.

c-SEM analysis of pos-catalysis hybrid materials

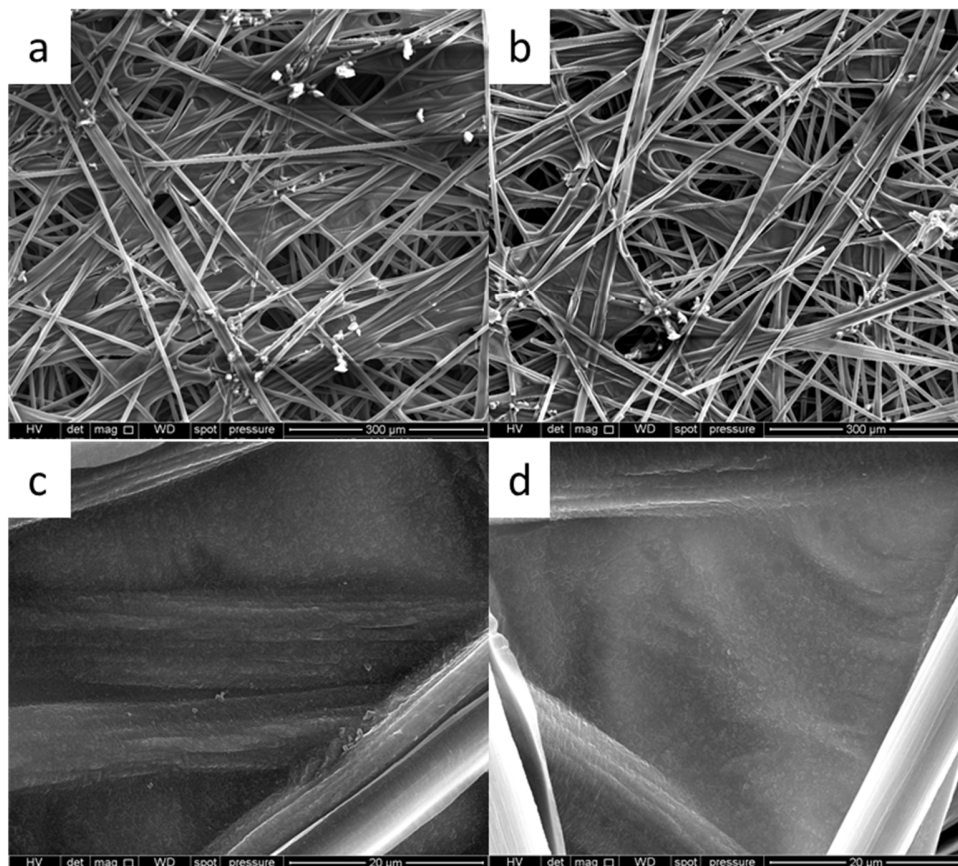

**Figure S4.** SEM analysis of post-catalysis hybrid electrodes a,c) TCP-Al-GO-NiFe and b,d) TCP-G-GO-NiFe.

### 3-STEM-EDX analysis of TCP-G-GO-400-NiFe

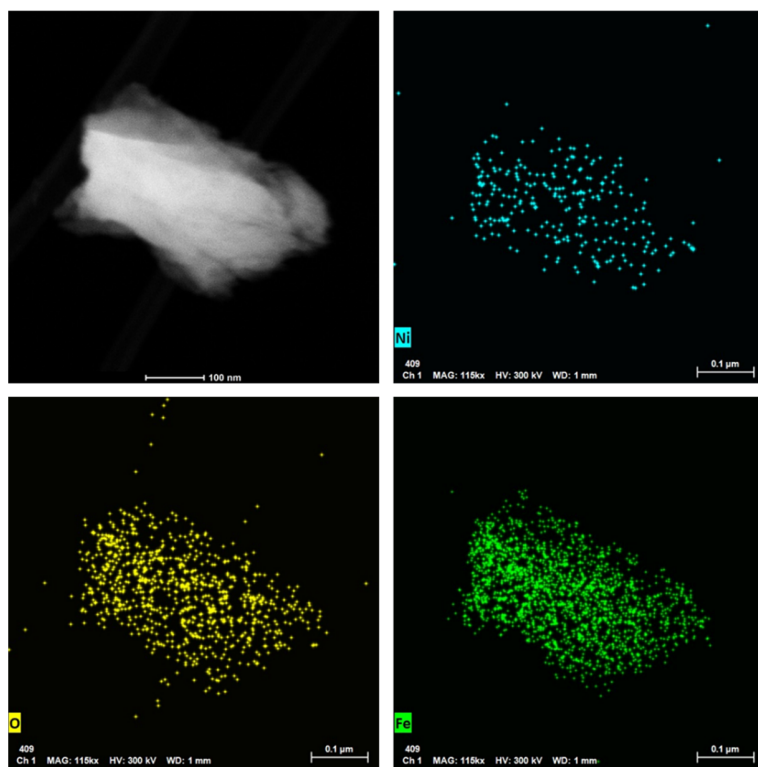

**Figure S5.** STEM-EDX images and mapping of TCP-G-GO-400-NiFe the homogeneous distributions of elemental Ni, Fe and O along the graphene surface.

#### 4- Electrochemical measurements

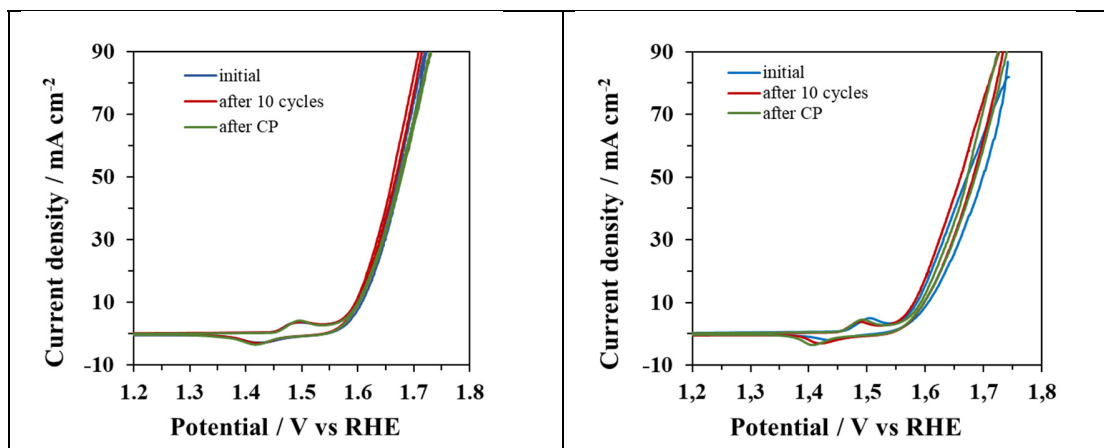

**Figure S6.** Potential cycling stability results for TCP-G-GO-NiFe (left) and TCP-Al-GO-NiFe (right). All the experiments were carried out at 20 mVs<sup>-1</sup> in KOH 1M.
